# Supplementary material
Source: PubMed Central journal article supplement (PMC2743335)
Supplement: NIHMS125271-supplement-1.pdf [file NIHMS125271-supplement-1.pdf]

## Supplementary Information Titles

Please list each supplementary item and its title or caption, in the order shown below.

**Note that we do NOT copy edit or otherwise change supplementary information, and minor (nonfactual) errors in these documents cannot be corrected after publication.**  
Please submit document(s) exactly as you want them to appear, with all text, images, legends and references in the desired order, and check carefully for errors.

**Journal:** Nature Medicine

|                       |                                                                                           |
|-----------------------|-------------------------------------------------------------------------------------------|
| Article Title:        | NADPH Oxidase-4 Mediates Myofibroblast Activation and Fibrogenic Responses to Lung Injury |
| Corresponding Author: | Victor J. Thannickal                                                                      |

| Supplementary Item & Number<br>(add rows as necessary) | Title or Caption                                                                                                                                                                                                                                                                     |
|--------------------------------------------------------|--------------------------------------------------------------------------------------------------------------------------------------------------------------------------------------------------------------------------------------------------------------------------------------|
| Supplementary Figure 1                                 | Regulation of NOX4 by TGF- $\beta$ 1 in human fetal lung mesenchymal cells (hFLMCs) and IPF mesenchymal cells (IPF-MCs)                                                                                                                                                              |
| Supplementary Figure 2                                 | Validation of the efficacy of NOX4 siRNA in <i>ex vivo</i> culture of murine lung mesenchymal cells and the <i>in vivo</i> anti-fibrotic effects of pharmacologic inhibition of NOX/flavoenzyme activity during the post-inflammatory phase of bleomycin-induced lung injury in mice |
| Supplementary Table 1                                  | Human and Murine siRNA and PCR Primers                                                                                                                                                                                                                                               |
